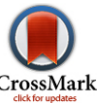

## Correction

# Correction: Regulatory T Cell Ablation Causes Acute T Cell Lymphopenia

## The PLOS ONE Staff

In the Methods section, the authors found a mistake regarding the dose of diphtheria toxin (DT) used to challenge the mice described in the methods section:

"*In vivo* Treg Cell Ablation

Treg cell ablation in adult *Foxp3<sup>ΔDTR</sup>* mice was accomplished by a single i.p injection of DT (Sigma) at a dose of 50 mg/kg..."

50 mg/kg should be corrected to 50 μg/kg.

## Reference

1. Moltedo B, Hemmers S, Rudensky AY (2014) Regulatory T Cell Ablation Causes Acute T Cell Lymphopenia. PLoS ONE 9(1): e86762. doi:10.1371/journal.pone.0086762

**Citation:** The PLOS ONE Staff (2014) Correction: Regulatory T Cell Ablation Causes Acute T Cell Lymphopenia. PLoS ONE 9(5): e99340. doi:10.1371/journal.pone.0099340

**Published:** May 20, 2014

**Copyright:** © 2014 The PLOS ONE Staff. This is an open-access article distributed under the terms of the Creative Commons Attribution License, which permits unrestricted use, distribution, and reproduction in any medium, provided the original author and source are credited.
